# Supplementary material for: Diversity of lateral line patterns and neuromast numbers in the genus Oryzias
Source: Oxford University Press journal article supplement (doi:10.1242/jeb.242490), 2021-12-13
Supplement: jeb242490supp.pdf [file jeb242490supp.pdf]

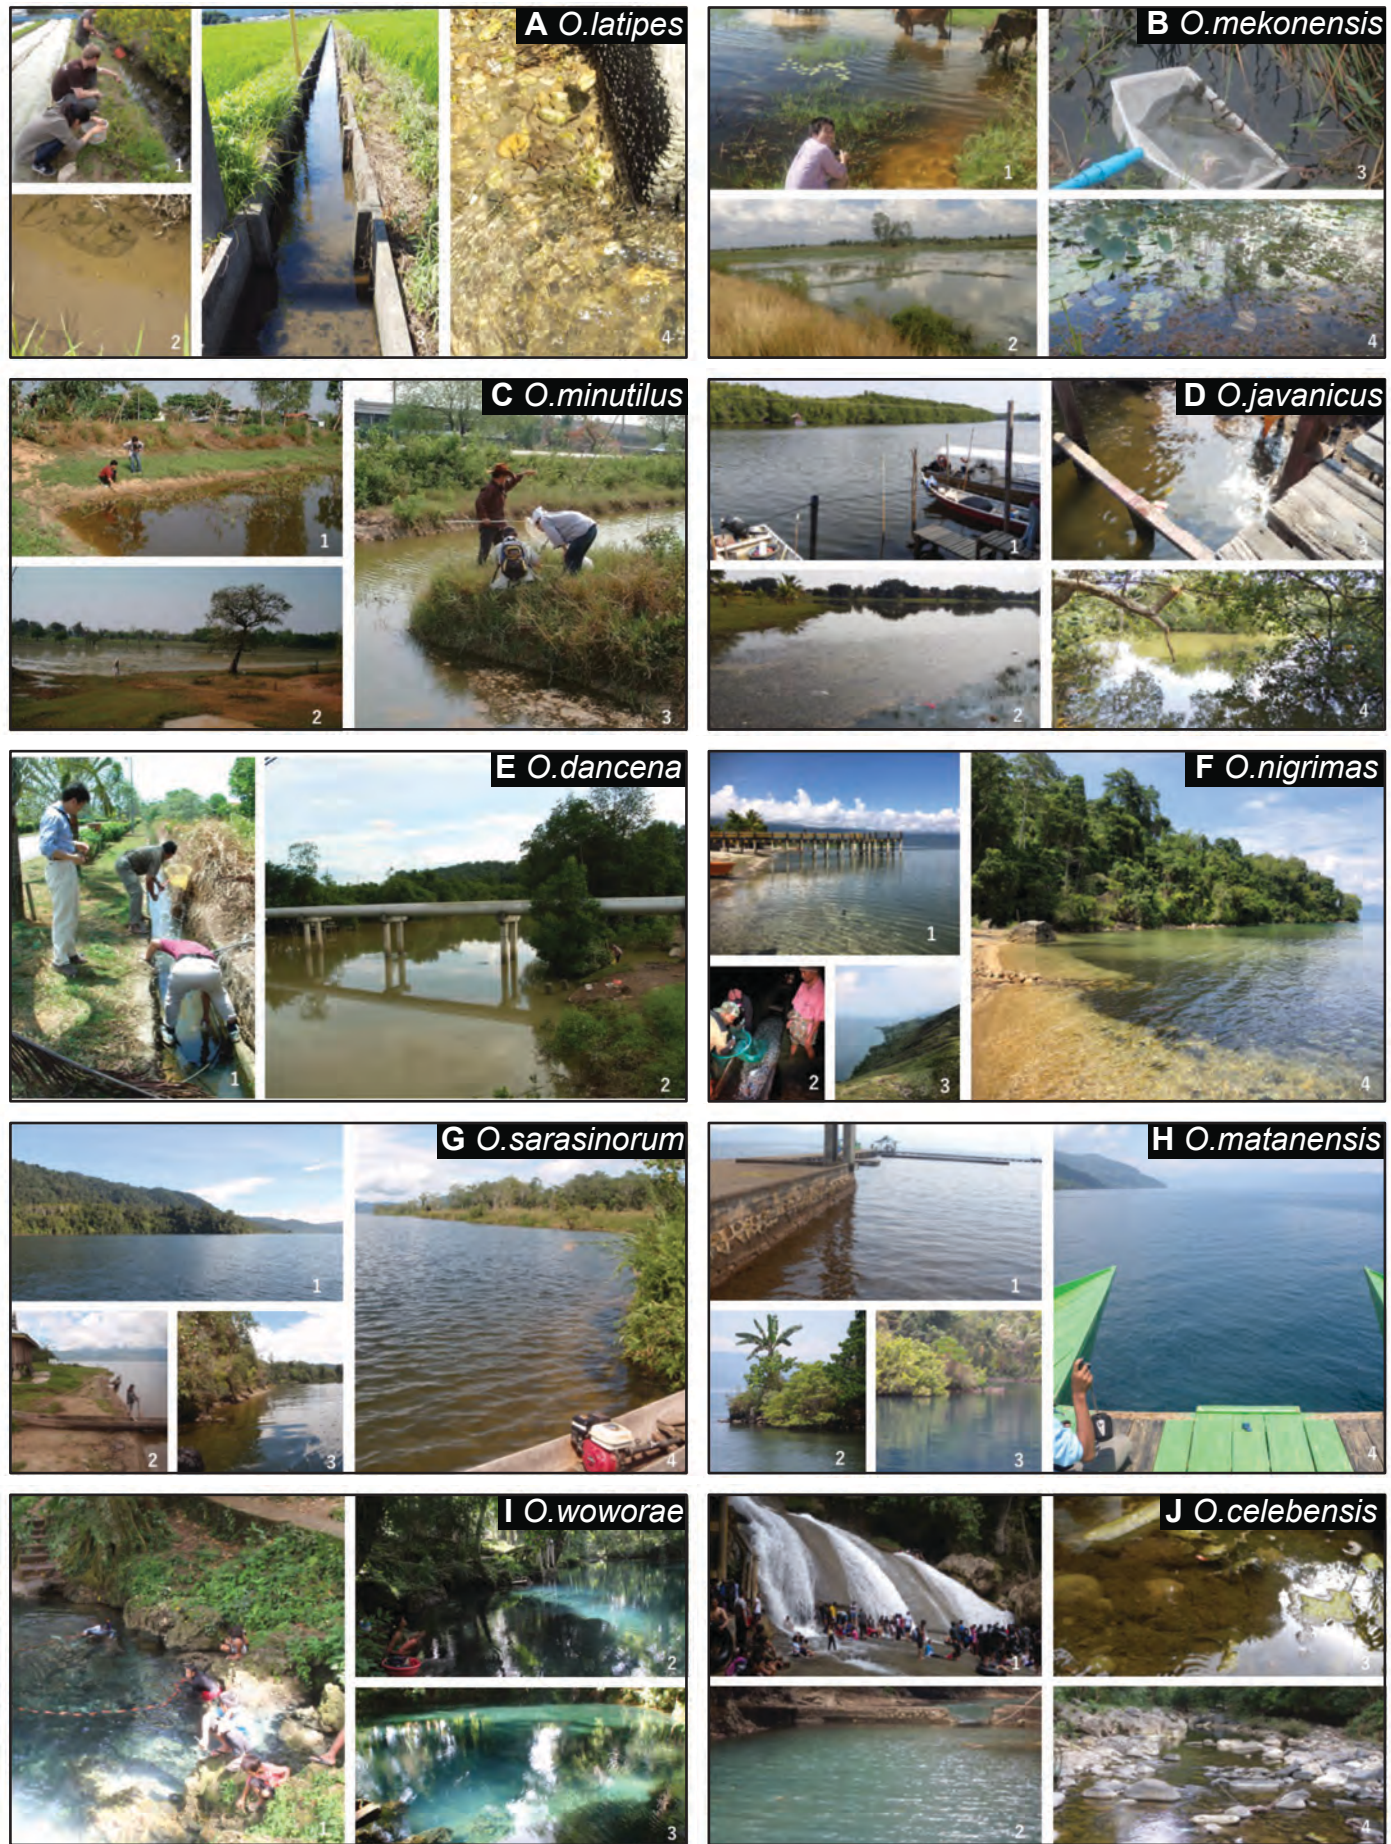

**Fig. S1. Habitats of different *Oryzias* species**

Natural environment for the different species in the *Oryzias* genus. **(S1A)** Typical habitats of *O. latipes* in Japan. *O. latipes* live in the small creeks, rice paddy fields (S1A1, 3) swims near surface water and tend to live in relatively shallow areas (Fig S1A 2 and 4). **(S1B)** Habitats of *O. mekongensis* in Thailand. *O. mekongensis* inhabits ponds covered with water plants. **(S1C)** Habitats of *O. minutillus* in Thailand. *O. minutillus* lives in ponds and small creeks (S1C 1-3) but in the open water area - compare with *O. mekongensis* (Pictures are courtesy of Yusuka Takehana, Nagahama Institute of Bio-Science and Technology). **(S1D)** Habitats of *O. javanicus* in Malaysia. *O. javanicus* lives in brackish water (S1D2, 4) to seawater area (S1D 1 and 3) in the mangrove forests (Fig. S1D1, 4). **(S1E)** Habitats of *O. dancena* in Malaysia, which is similar with *O. javanicus*, but with lower salinity values, from freshwater (S1D 1) to brackish water (S1D 2) (Pictures are courtesy of Koji Inoue, University of Tokyo & Masato Kinoshita, Kyoto University). **(S1F)** Habitats of *O. nigrimas* in the Lake Poso, Sulawesi island. *O. nigrimas* live in near shore of the lake Poso (Fig S1F 1, 4) where it is important for fisheries activity in the lake (Fig S1F 2). **(S1G)** Habitats of *O. sarasinorum* in the lake Lindu, Sulawesi island. *O. sarasinorum* inhabit the relatively pelagic area in the lake Lindu. **(S1H)** Habitats of *O. matanensis* in the lake Matana, Sulawesi island. *O. matanensis* inhabits near the shore. **(S1I)** Habitats of *O. woworae* typically in clear springs in Mauna island, Sulawesi island. **(S1J)** Habitats of *O. celebensis*, in relatively fast running rivers. *Oryzias* species in Sulawesi island (*O. sarasinorum*, *O. nigrimas*, *O. matanensis*, *O. marmoratus* and *O. profundicola*) are relatively unique compared with other *Oryzias* species, since these species mainly live in deep tectonic lakes like Poso, Lindu, Matana, Towti and Maholona.

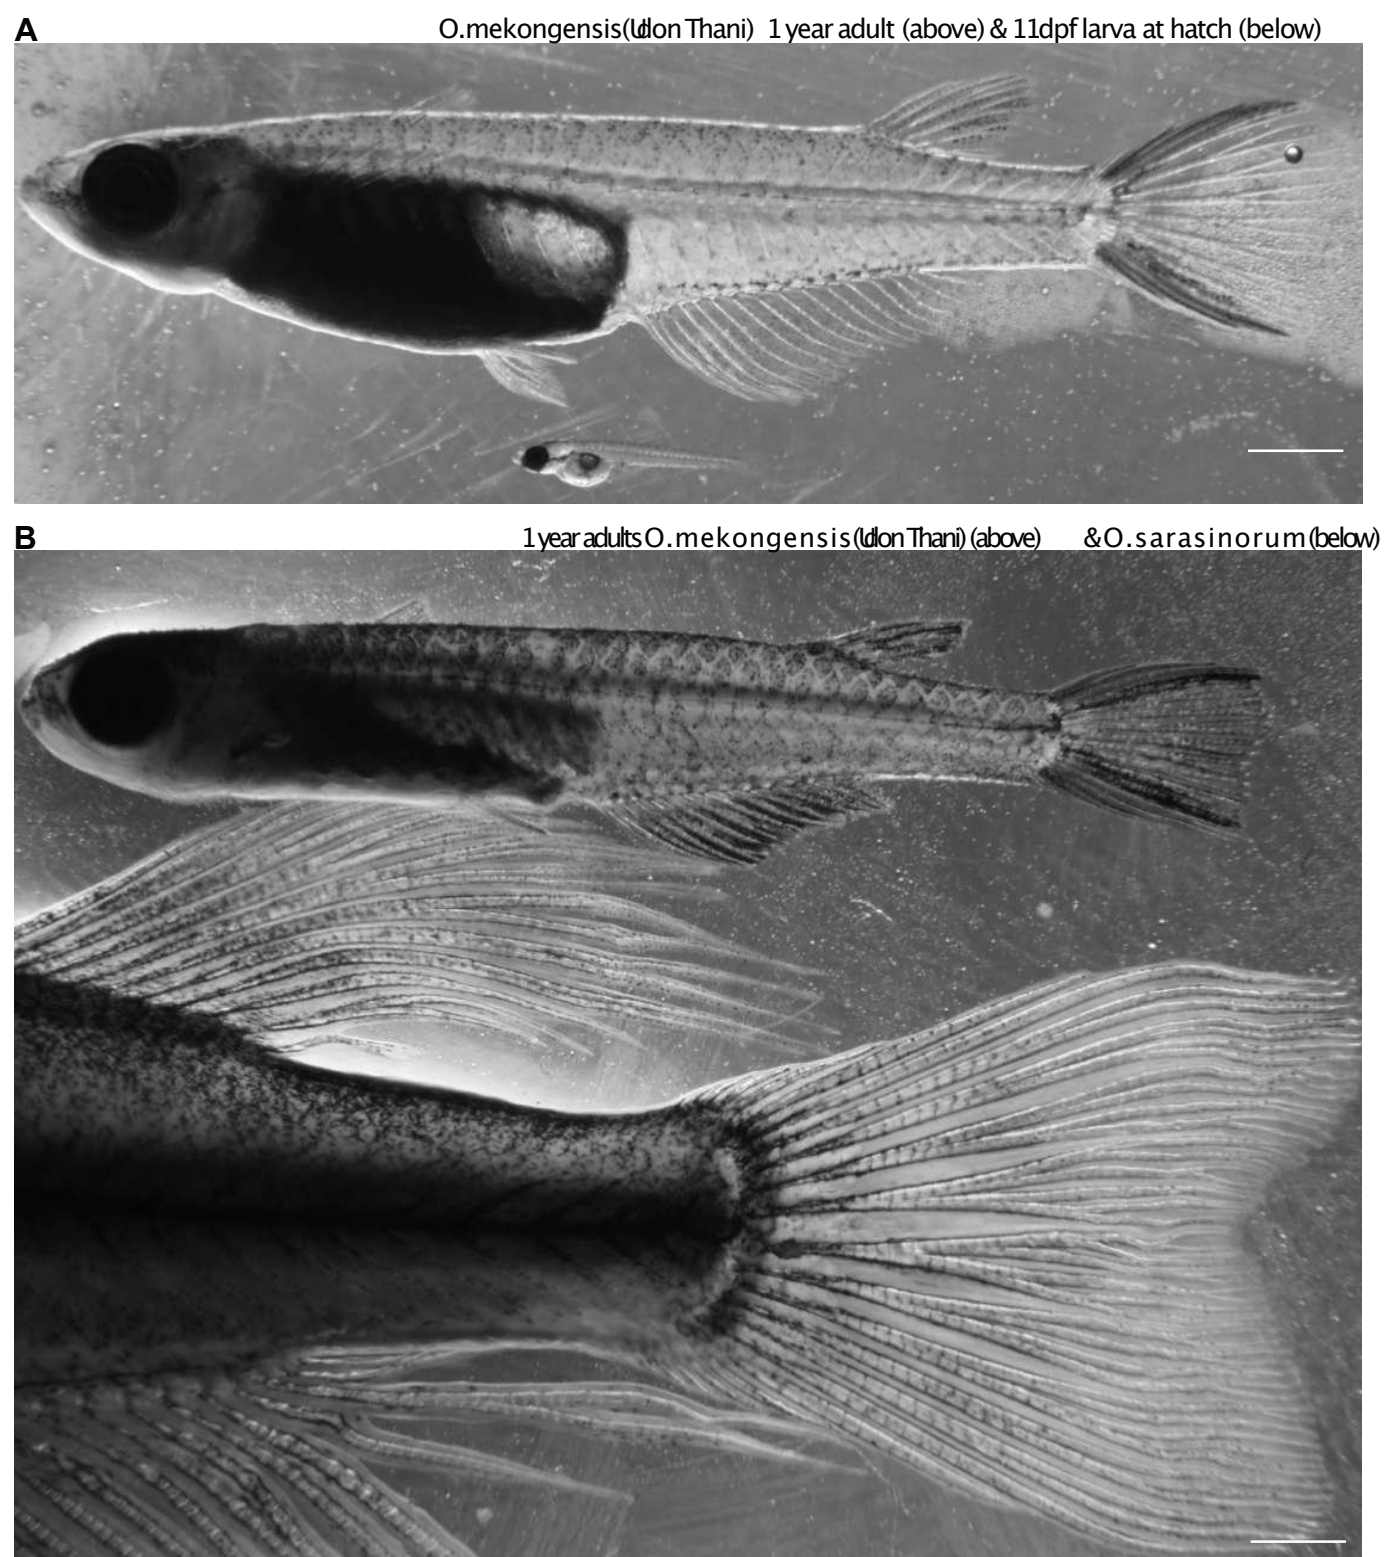

**Fig. S2. Size differences between *Oryzias mekongensis* and *O. sarasinorum***

(A) Bright-field images showing differences in size between *O. mekongensis* (Udon Thani) one-year old adult (above) compared to an 11dpf larva (below). (B) Bright-field images showing differences in size between *O. mekongensis* (Udon Thani) one year old adult (above) and *O. sarasinorum* one year old adult (below). Scale bar in (A) and (B) = 1.6 mm. Anterior is to the left and dorsal is up in all panels.

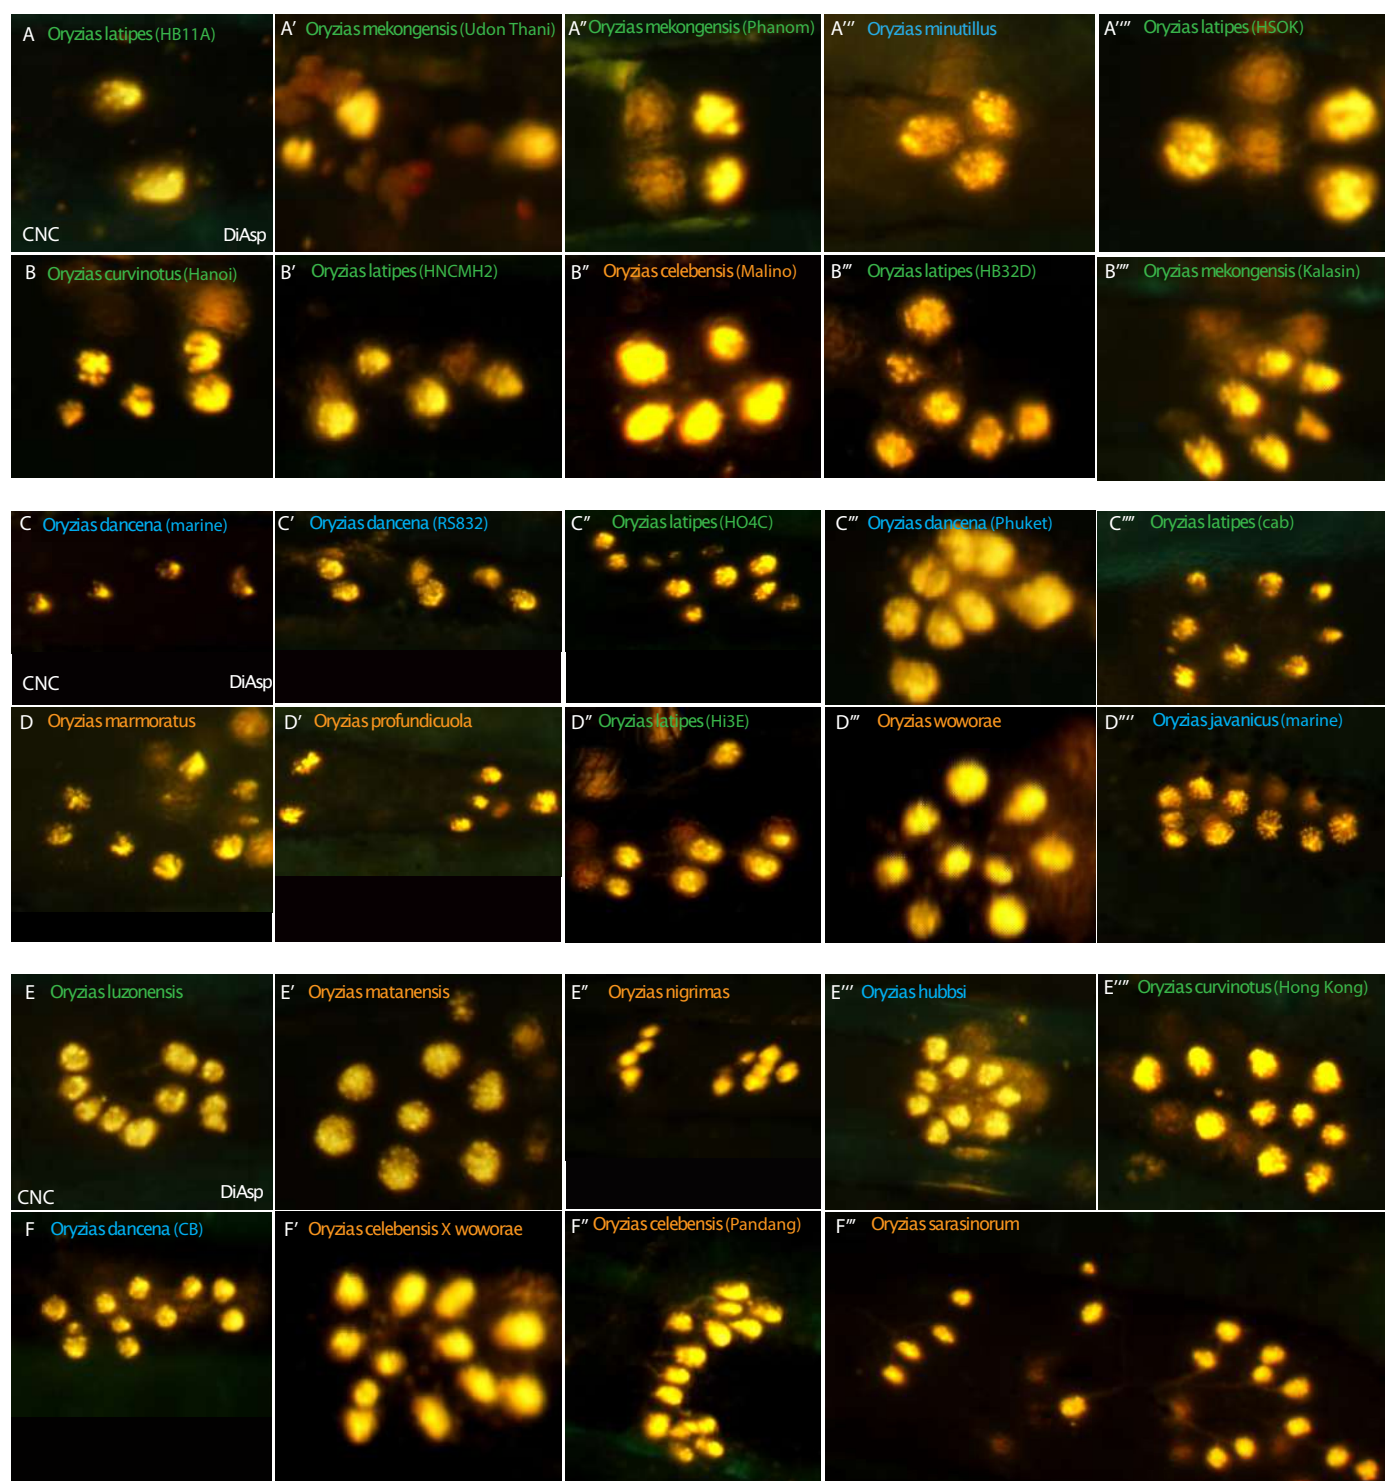

**Fig. S3. Caudal neuromast cluster (CNC) organ numbers and distribution in the *Oryzias* group - extended**

(A-F''') CNC organ numbers and patterns in 1 year old adult *Oryzias* group members obtained via fluorescent imaging of Diasp-2 treated fish. Images are arranged from the least elaborate to the most elaborate: (A) *O. latipes* (HB11A), (A') *O. mekongensis* (Udon Thani), (A'') *O. mekongensis* (Nakhon Phanom), (A''') *O. minutillus*, (A''''') *O. latipes* (HSOK)sb, (B) *O. curvinotus* (Hanoi), (B') *O. latipes* (HNCMH2), (B'') *O. celebensis* (Malino), (B''') *O. latipes* (HB32D), (B''''') *O. mekongensis* (Kalasin), (C) *O. dancena* (marine), (C') *O. dancena* (RS832), (C'') *O. latipes* (HO4C), (C''') *O. dancena* (Phuket), (C''''') *O. latipes* (Cab), (D) *O. marmoratus*, (D') *O. profundicuola*, (D'') *O. latipes* (Hi3E), (D''') *O. woworae*, (D''''') *O. javanicus* (Penang), (E) *O. luzonensis*, (E') *O. matanensis*, (E'') *Oryzias nigrimas*, (E''') *Oryzias hubbsi*, (E''''') *Oryzias curvinotus* (Hong Kong), (F) *Oryzias dancena* (Chidambaram), (F') F1 Hybrid *Oryzias woworae* X *celebensis* (Ujung Pandang), (F'') *O. celebensis* (Ujung Pandang), (F''') *O. sarasinorum*. Notice the differences in organ numbers and patterns between the different species and strains with *O. latipes* (HB11A), *O. mekongensis* and *O. minutillus* having the least elaborate CNCs while *O. sarasinorum* and *O. celebensis* (Ujung Pandang) having the most elaborate. Anterior is to the left and dorsal is up in all panels. Species names are colour coded according to sub-group (as in Figure 1); *O. latipes* complex in green, *O. celebensis* complex in orange and *O. javanicus* complex in blue.

**Table S1.** Accession numbers of *ND2* and *cyt b* sequences used in the mtDNA phylogeny.

| Species                      | Locality / Collection site                                | Classification by molecular phylogeneny | Accession number for mtDNA phylogeny |          | Strain        | NBRP strain ID | Comments               |
|------------------------------|-----------------------------------------------------------|-----------------------------------------|--------------------------------------|----------|---------------|----------------|------------------------|
|                              |                                                           |                                         | ND2                                  | cyt b    |               |                |                        |
| <i>Oryzias celebensis</i>    | Malino River, Lake Tempe, South Sulawesi, Indonesia       | <i>celebensis</i> species group         | LC051717                             | LC051664 | Malino        | RS279          |                        |
|                              |                                                           |                                         |                                      |          | Ujung Pandang | RS278          |                        |
| <i>Oryzias curvinotus</i>    | So Lo Pun, Hong Kong. Bang La, Do Son and Dai Hop Vietnam | <i>latipes</i> species group            | LC051739                             | LC051686 | Hanoi         | RS268          |                        |
|                              |                                                           |                                         |                                      |          | Hong Kong     | RS269          |                        |
| <i>Oryzias dancena</i>       | Chidambaram, Tamil Nadu, India and Phuket, Thailand       | <i>javanicus</i> species group          | AB498069                             | AB498069 | Chidambaram   | RS274          |                        |
|                              |                                                           |                                         |                                      |          | HK-1          | -              | Maintained in seawater |
|                              |                                                           |                                         |                                      |          | Phuket        | RS275          |                        |
|                              |                                                           |                                         |                                      |          | RS832         | RS832          |                        |
| <i>Oryzias hubbsi</i>        | Tangerang, Indonesia                                      | <i>javanicus</i> species group          | LC497921                             | N.A.     | -             | RS273          |                        |
| <i>Oryzias javanicus</i>     | Penang, Malaysia to Pangkajene, Sulawesi, Indonesia       | <i>javanicus</i> species group          | LC051734                             | LC051681 | Penang        | RS831          | Maintained in seawater |
| <i>Oryzias latipes</i>       | Japan, China and Korea                                    | <i>latipes</i> species group            | LC051738                             | LC051685 | Cab           | MT830          |                        |
|                              |                                                           |                                         |                                      |          | HB11A         | IB185          | Inbred strain          |
|                              |                                                           |                                         |                                      |          | HB32D         | IB184          | Inbred strain          |
|                              |                                                           |                                         |                                      |          | Hi3E          | IB186          | Inbred strain          |
|                              |                                                           |                                         |                                      |          | HNCMH2        | IB182          | Inbred strain          |
|                              |                                                           |                                         |                                      |          | HO4C          | IB180          | Inbred strain          |
|                              |                                                           |                                         |                                      |          | HSOK          | IB183          | Inbred strain          |
| <i>Oryzias luzonensis</i>    | Solsona, Ilocos Norte Province, Philippines               | <i>latipes</i> species group            | AB498064                             | AB498064 | -             | RS270          |                        |
| <i>Oryzias marmoratus</i>    | Lake Towuti, South Sulawesi, Indonesia                    | <i>celebensis</i> species group         | LC051709                             | LC051656 | -             | RS280          |                        |
| <i>Oryzias matanensis</i>    | Lake Matano, South Sulawesi, Indonesia                    | <i>celebensis</i> species group         | LC051705                             | LC051652 | -             | RS281          |                        |
| <i>Oryzias mekongensis</i>   | Udon Thani, Thailand. Along Mekong river                  | <i>latipes</i> species group            | LC497922                             | AB084756 | Kalasin       | RS271          |                        |
|                              |                                                           |                                         |                                      |          | Nakhon Phanom | RS272          |                        |
|                              |                                                           |                                         |                                      |          | Udon Thani    | RS915          |                        |
| <i>Oryzias minutillus</i>    | Chai Nat, Thailand                                        | <i>javanicus</i> species group          | AB498068                             | AB498068 | -             | RS277          |                        |
| <i>Oryzias nigrimas</i>      | Lake Poso, Central Sulawesi, Indonesia                    | <i>celebensis</i> species group         | LC051707                             | LC051654 | -             | RS282          |                        |
| <i>Oryzias profundicuola</i> | Lake Towuti, South Sulawesi, Indonesia                    | <i>celebensis</i> species group         | LC051697                             | LC051644 | -             | RS283          |                        |
| <i>Oryzias sarasinorum</i>   | Lake Lindu, Central Sulawesi, Indonesia                   | <i>celebensis</i> species group         | LC051691                             | LC051638 | -             | RS284          |                        |
| <i>Oryzias woworae</i>       | Fotuno Fountain, Muna Island, Indonesia                   | <i>celebensis</i> species group         | LC051723                             | LC051670 | -             | -              |                        |
| <i>Hyporhamphus sajori</i>   | -                                                         | -                                       | AB370892                             | AB370892 | -             | -              | Outgroup for phylogeny |
| <i>Cololabis saira</i>       | -                                                         | -                                       | AP002932                             | AP002932 | -             | -              | Outgroup for phylogeny |

**Table S2.** Number of adult males analysed per species & strains, and maximum reported body size for each species.

| Species                      | Species Group     | Strain        | N Adults Analysed | Reported adult length |
|------------------------------|-------------------|---------------|-------------------|-----------------------|
| <i>Oryzias celebensis</i>    | <i>celebensis</i> | Ujung Pandang | 3                 | 3,3 cm                |
| <i>Oryzias curvinotus</i>    | <i>latipes</i>    | Hanoi         | 3                 | nd                    |
|                              |                   | Hong Kong     | 3                 | 2,6 cm                |
| <i>Oryzias dancena</i>       | <i>javanicus</i>  | Chidambaram   | 2                 | 3,3 cm                |
|                              |                   | HK-1          | 4                 | nd                    |
|                              |                   | Phuket        | 4                 | 3,2 cm                |
| <i>Oryzias hubbsi</i>        | <i>javanicus</i>  | -             | 2                 | 2,2 cm                |
| <i>Oryzias javanicus</i>     | <i>javanicus</i>  | Penang        | 4                 | nd                    |
| <i>Oryzias latipes</i>       | <i>latipes</i>    | Cab           | 5                 | 3,2 cm                |
|                              |                   | HB11A         | 3                 | nd                    |
|                              |                   | HB32D         | 2                 | nd                    |
|                              |                   | Hi3E          | 2                 | nd                    |
|                              |                   | HNCMH2        | 3                 | nd                    |
|                              |                   | HO4C          | 3                 | nd                    |
|                              |                   | HSOK          | 2                 | nd                    |
|                              |                   | -             | 2                 | nd                    |
| <i>Oryzias luzonensis</i>    | <i>latipes</i>    | -             | 4                 | 3,4 cm                |
| <i>Oryzias marmoratus</i>    | <i>celebensis</i> | -             | 3                 | 4,2 cm                |
| <i>Oryzias matanensis</i>    | <i>celebensis</i> | -             | 6                 | 4,3 cm                |
| <i>Oryzias mekongensis</i>   | <i>latipes</i>    | Kalasin       | 6                 | 2,1 cm                |
|                              |                   | Nakhon Phanom | 2                 | nd                    |
|                              |                   | Udon Thani    | 4                 | nd                    |
| <i>Oryzias minutillus</i>    | <i>javanicus</i>  | -             | 2                 | 2 cm                  |
| <i>Oryzias nigrimas</i>      | <i>celebensis</i> | -             | 5                 | 4,3 cm                |
| <i>Oryzias profundicuola</i> | <i>celebensis</i> | -             | 4                 | 4,2 cm                |
| <i>Oryzias sarasinorum</i>   | <i>celebensis</i> | -             | 4                 | 4,8 cm                |
| <i>Oryzias woworae</i>       | <i>celebensis</i> | -             | 3                 | 2,8 cm                |

**Table S3.** Number of samples analysed per species and per LL region, together with the corresponding 95 CI mean.

| Species                               | aLL |      |     |            | pLL |      |     |           | CNC |      |     |            |
|---------------------------------------|-----|------|-----|------------|-----|------|-----|-----------|-----|------|-----|------------|
|                                       | n   | mean | sd  | 95CI mean  | n   | mean | sd  | 95CI mean | n   | mean | sd  | 95CI mean  |
| <i>Oryzias celebensis</i> (Pandang)   | 11  | 9,5  | 3,2 | 7.2 - 11.7 | 20  | 8,5  | 1,8 | 7.7 - 9.3 | 4   | 13,2 | 1,5 | 10.5 - 16  |
| <i>Oryzias curvinotus</i> (Hanoi)     | 6   | 3,2  | 1,2 | 1.8 - 4.5  | 16  | 2,9  | 1   | 2.4 - 3.5 | 4   | 4    | 0,8 | 2.5 - 5.5  |
| <i>Oryzias curvinotus</i> (Hong Kong) | 7   | 4,7  | 1   | 3.8 - 5.7  | 17  | 4,8  | 1,4 | 4.1 - 5.6 | 4   | 9,2  | 1   | 7.5 - 11   |
| <i>Oryzias dancena</i> (CB)           | 11  | 4,7  | 1,1 | 3.9 - 5.5  | 20  | 4    | 1,4 | 3.3 - 4.6 | 4   | 10,5 | 1   | 8.7 - 12.3 |
| <i>Oryzias dancena</i> (marine)       | 9   | 3,8  | 1,6 | 2.5 - 5.1  | 11  | 2,5  | 0,9 | 1.9 - 3.2 | 6   | 5,5  | 1,4 | 3.9 - 7.1  |
| <i>Oryzias dancena</i> (phuket)       | 11  | 6,2  | 1,6 | 5.1 - 7.3  | 17  | 5,4  | 1,7 | 4.5 - 6.2 | 2   | 7    | 1,4 | 11 - 25    |
| <i>Oryzias hubbsi</i>                 | 11  | 4,6  | 1,4 | 3.7 - 5.6  | 16  | 5    | 1,3 | 4.3 - 5.7 | 3   | 9,7  | 1,2 | 6.2 - 13.2 |
| <i>Oryzias javanicus</i> (marine)     | 8   | 5,4  | 1,7 | 3.9 - 6.9  | 16  | 4    | 1,3 | 3.3 - 4.7 | 4   | 8    | 2,2 | 4 - 12     |
| <i>Oryzias latipes</i> (Cab)          | 8   | 3,9  | 1,2 | 2.8 - 5    | 15  | 5,3  | 1,1 | 4.6 - 5.9 | 9   | 7,1  | 1,6 | 5.8 - 8.4  |
| <i>Oryzias luzonensis</i>             | 11  | 3,2  | 1,5 | 2.1 - 4.3  | 17  | 2,4  | 0,9 | 1.9 - 2.8 | 4   | 8,2  | 1,7 | 5.1 - 11.4 |
| <i>Oryzias marmoratus</i>             | 7   | 5,9  | 1,6 | 4.3 - 7.4  | 19  | 4,9  | 1,7 | 4.1 - 5.8 | 4   | 6,8  | 1,5 | 4 - 9.5    |
| <i>Oryzias matanensis</i>             | 9   | 7    | 1,7 | 5.6 - 8.4  | 20  | 4,7  | 1,6 | 3.9 - 5.5 | 4   | 8,8  | 1,7 | 5.6 - 11.9 |
| <i>Oryzias mekongensis</i> (Kalasin)  | 5   | 2    | 1,2 | 0.3 - 3.7  | 11  | 4,5  | 0,7 | 4 - 4.9   | 9   | 5,1  | 2,3 | 3.3 - 7    |
| <i>Oryzias mekongensis</i> (N.Phanom) | 9   | 1,3  | 0,5 | 0.9 - 1.7  | 11  | 2,7  | 0,8 | 2.2 - 3.3 | 2   | 2,5  | 0,7 | 6.5 - 11.5 |
| <i>Oryzias mekongensis</i> (U.Thani)  | 8   | 1,5  | 0,5 | 1 - 2      | 11  | 1,7  | 0,6 | 1.3 - 2.2 | 8   | 1,8  | 1,2 | 0.7 - 2.8  |
| <i>Oryzias minutillus</i>             | 6   | 1,7  | 0,5 | 1.1 - 2.3  | 11  | 2,3  | 1,2 | 1.4 - 3.1 | 2   | 2,5  | 0,7 | 6.5 - 11.5 |
| <i>Oryzias nigrimas</i>               | 11  | 5,5  | 1,3 | 4.5 - 6.4  | 17  | 4,6  | 1,2 | 4 - 5.2   | 6   | 8,7  | 0,8 | 7.7 - 9.6  |
| <i>Oryzias profundicuola</i>          | 7   | 6,6  | 1,7 | 4.9 - 8.3  | 17  | 5,1  | 1,5 | 4.3 - 5.9 | 3   | 7,3  | 3,5 | 3.4 - 18   |
| <i>Oryzias sarasinorum</i>            | 9   | 7,8  | 2   | 6.2 - 9.4  | 20  | 4,3  | 0,8 | 3.9 - 4.7 | 2   | 17,5 | 0,7 | 8.5 - 26.5 |
| <i>Oryzias woworae</i> (indonesian)   | 10  | 9    | 3,5 | 6.4 - 11.6 | 17  | 6,7  | 1,8 | 5.7 - 7.7 | 4   | 8,2  | 1,5 | 5.5 - 11   |
